1 **Soil microbial communities in diverse agroecosystems exposed to glyphosate**

2 Ryan M. Kepler<sup>1</sup>, Dietrich J. Epp Schmidt<sup>2</sup>, Stephanie A. Yarwood<sup>2</sup>, Krishna N. Reddy<sup>3</sup>, Stephen  
3 O. Duke<sup>4</sup>, Carl A. Bradley<sup>5</sup>, Martin M. Williams II<sup>6</sup>, Jeffery Buyer<sup>1</sup>, Michel A. Cavigelli<sup>1</sup>, Jude E.  
4 Maul<sup>1</sup>

5 <sup>1</sup>Sustainable Agricultural Systems Laboratory, USDA-ARS

6 10300 Baltimore Ave, bldg. 001

7 Beltsville, MD 20705

8 <sup>2</sup>Environmental Science and Technology Department, University of Maryland,

9 1204 HJ Patterson Hall

10 College Park, MD 20742, USA

11 <sup>3</sup>Crop Production Systems Research Unit, USDA-ARS

12 P.O. Box 350, Stoneville, Mississippi 38776

13 <sup>4</sup>Natural Products Utilization Research Unit, USDA-ARS

14 P.O. Box 1848, University, Mississippi 38677

15 <sup>5</sup>Department of Plant Pathology, University of Kentucky Research and Education Center

16 Princeton, KY 42445

17 <sup>6</sup>Global Change and Photosynthesis Research, USDA-ARS

18 1102 S. Goodwin Avenue

19 Urbana, Illinois 61801

20 **Corresponding author:** Jude Maul. [Jude.Maul@ARS.USDA.GOV](mailto:Jude.Maul@ARS.USDA.GOV). phone: 301-504-9068

21 **Conflict of interest**

22 The authors declare they have no conflict of interest.

23

## 24 **Abstract**

25 In spite of glyphosate's wide use in agriculture, questions remain about effects of the herbicide  
26 on soil microbial communities. Conflicting scientific literature reports divergent results; from no  
27 observable effect of glyphosate to the enrichment of common agricultural pathogens such as  
28 *Fusarium*. We conducted a comprehensive field-based study to compare treatments that did  
29 and did not receive foliar application of glyphosate spray. The study included two field sites,  
30 Maryland and Mississippi; two crops, soybean and corn; four site years, 2013 and 2014; and a  
31 variety of organic and conventional farming systems. Using amplicon sequencing, the  
32 prokaryotic (16S rRNA) and fungal (ITS) communities were described along with chemical and  
33 physical properties of the soil. Sections of corn and soy roots were plated to screen for the  
34 presence of plant pathogens. Geography, farming system, and seasonal progression were  
35 significant factors determining composition of fungal and bacterial communities. Plots treated  
36 with or without glyphosate did not differ in overall microbial community composition after  
37 controlling for these factors. No differential effect of glyphosate treatment was found in the  
38 relative abundance of organisms such as *Fusarium* spp. or putative growth-promoting bacteria  
39 *Pseudomonas* spp.

## 40 41 **Introduction**

42 Providing food for the exponentially growing global human population [1] requires  
43 agricultural productivity to double by the year 2050 [2]. Thirty six percent of the Earth's potential  
44 agricultural land is already under production, and much of the remaining land is considered  
45 marginal and susceptible to degradation when put under intensive management [3]. External  
46 inputs for nutritional supplementation and pest control are significant production costs and non-  
47 point sources of pollution that negatively impact human and environmental health. Thus, to  
48 continue feeding the world population, farmers need new approaches to increase agricultural  
49 productivity while simultaneously mitigating negative environmental impacts [2, 4].

50 Introduction of genetically modified glyphosate-resistant (GR) crops has transformed  
51 agroecosystems across the globe by increasing adoption of no-till agriculture where weeds are  
52 controlled chemically rather than by tillage [5]. Glyphosate interrupts the shikimate biosynthesis  
53 pathway [6], which is responsible for the production of aromatic amino acids and other key  
54 components of cell metabolism. The shikimate pathway is found in bacteria, fungi, algae, plants  
55 and some protozoans, although not in animals. Glyphosate competitively binds to the enzyme 5-  
56 enolpyruvylshikimate 3-phosphate synthase (EPSPS) and is known to be lethal to most species  
57 of plants and a large proportion fungi. However, some microbes are resistant to glyphosate due  
58 to rapid metabolism of glyphosate or to a GR form of EPSPS. Once this biosynthetic pathway is  
59 blocked, plants die due to metabolic disruption. Even at sub lethal application rates [7, 8]  
60 glyphosate can weaken a plant's hypersensitive response enough that a pathogen is able to  
61 infect and kill the plant. In the absence of a pathogen the plant may have a stunted appearance  
62 for a few weeks but then recover.

63 Plants have been shown to exude glyphosate from their roots within 24 hrs of foliar  
64 application [9]. Glyphosate strongly binds to some soil components, making it rather immobile in  
65 most soil types [10]. Its tight binding to soil contributes to its weak phytotoxicity to plants as a  
66 soil applied herbicide. The episodic exudation of glyphosate may have indirect effects on the  
67 soil microbial community, and these changes may be important to the long term sustainability of  
68 agroecosystems, but patterns or changes in the microbial community are difficult to detect in the  
69 context of seasonality, changing crop species, and geographic locations.

70 Concerns have been raised about increased pathogen loads and suppression of  
71 beneficial organisms associated with glyphosate use [11, 12]. There are two mechanisms by  
72 which glyphosate could enrich the soil for plant pathogens: 1) pathogens can attack glyphosate-  
73 susceptible weeds that succumb to the herbicide, the dying biomass of which then acts as  
74 refugia for subsequent crop infestation (green bridge) or 2) pathogens can gain a "foothold" in a  
75 glyphosate-resistant plant due to reduced immune response from alterations in the shikimate

76 pathway, resulting in a non-lethal infection that allows the pathogen to propagate. A review of all  
77 GR crops by Hammerschmidt [13] determined there is no conclusive evidence that glyphosate  
78 increases the susceptibility of GR crops to disease. Another review [14] challenges this  
79 conclusion. For example, several studies have observed that GR beets and soybean have  
80 increased susceptibility to pathogens when glyphosate is applied at recommended rates [14–  
81 16]. One study found no effect of glyphosate on disease induction in GR beets until rates  
82 exceeded normal field application rates by one order of magnitude [17]. However, other studies  
83 with GR crops have found no influence of glyphosate on disease [18], as well as instances of  
84 fungicidal activity against plant pathogens, especially rusts (reviewed by Duke [19]).

85         Two key studies have substantiated the glyphosate-pathogen-enrichment hypothesis,  
86 finding over long study periods that glyphosate repeatedly increases the rate of colonization of  
87 crops by *Fusarium* (presumed to be a pathogenic strain), while decreasing the abundance of  
88 fluorescent *Pseudomonas* bacteria (taken as putative beneficial organisms) in the soil [11, 16].  
89 These studies are often cited as conclusive evidence that long-term use of glyphosate increases  
90 the pathogen load and decreases the abundance of growth promoting bacteria in soils. Both  
91 studies applied culture-based methodology to quantify these microbial groups, with molecular  
92 analysis of the ribosomal internal transcribed spacer region (ITS) for fungi; however, the  
93 identification techniques employed were not sufficiently discriminatory to distinguish pathogenic  
94 and beneficial genotypes for either group. Studies using culture-free methodology to  
95 characterize microbial communities have failed to detect substantial glyphosate effects on  
96 pathogen abundance [20, 21]. The key to conclusive determination of glyphosate effect on  
97 microbial communities of GR crops is to carefully compare glyphosate sprayed and non-sprayed  
98 treatments within an agronomic context. Farming systems, soil factors, crop varieties,  
99 glyphosate legacy and application rates can all impact the behavior of glyphosate and its  
100 interaction with the crop and soil microbiome [22].

101           We conducted a field-scale study to observe the effects of glyphosate on the soil  
102   microbiome and plant health for corn and soybean GR varieties. Specifically, we tested the  
103   hypothesis glyphosate changes the composition of the soil microbiome when controlling for  
104   differences in soils, seasonal time points, and farming systems. Furthermore, we tested the  
105   hypothesis that *Fusarium* spp. sequence abundance or culturable numbers would increase due  
106   to glyphosate treatment. Our study includes six farming systems and a total of 12 site years,  
107   representing agricultural practices as implemented on working farms. Our study targeted both  
108   naïve soil microbiomes that have not been exposed to glyphosate and those exposed to  
109   glyphosate annually. High throughput sequencing was used to generate bacterial and archaeal  
110   16S rRNA profiles and fungal ITS profiles.

## 111   **Materials and Methods**

112   **Description of field sites and experimental design:** The study was conducted for two years  
113   at two United States Department of Agriculture, Agricultural Research Service (USDA-ARS)  
114   sites: the Sustainable Agricultural Systems Laboratory, Beltsville, MD and the Crop Production  
115   Systems Research Unit, Stoneville, MS.

116           The Beltsville site is managed as part of a USDA-Long Term Agricultural Research site  
117   typical of the mid-Atlantic region and described previously [23, 24]. We conducted the study in  
118   two conventional farming systems include one using a chisel plow for primary tillage (CT) and  
119   one under no-tillage management (NT). These two systems rely on mineral fertilizers,  
120   herbicides, and other pesticides as needed to manage a corn-rye cover crop-soybean-  
121   wheat/soybean rotation. One organic farming system is a three-year corn (*Zea mays*) -rye  
122   (*Cereale secale*) cover crop -soybean (*Glycine max*) -wheat (*Triticum aestivum*)/legume (*Vicia*  
123   *villosa*) rotation (Org3). The second organic farming system is a six-year crop rotation (Org6) in  
124   which alfalfa (*Medicago sativa*), a perennial crop in place for three years of the rotation,  
125   replaces the vetch present in Org3. The organic systems rely on legumes, poultry litter and  
126   K<sub>2</sub>SO<sub>4</sub> to supply crop nutrients in accordance to soil test results and local regulations. A

127 moldboard plow and/or a chisel plow is used for primary tillage in the organic systems. Weed  
128 control in the organic systems included use of a rotary hoe and between row cultivation after  
129 crops were planted.

130 In Stoneville the experiment was conducted in two adjacent fields, one with a legacy of  
131 glyphosate use, the other with no glyphosate history. The field with a history of glyphosate use  
132 had GR soybean and cotton (*Gossypium hirsutum*) grown in rotation for the last 15 years prior  
133 to the experiment. The field without glyphosate history had been maintained for weed biology  
134 studies in a cogongrass [*Imperata cylindrica* (L.) Beauv.] monoculture with no herbicides applied  
135 for 12 years prior to the experiment. Field preparation included killing the cogongrass with  
136 repeated tillage, planting non-GR soybean and non-GR corn for one season prior to the current  
137 field experiment, and flail mowing at maturity.

138 The experiment was conducted during both the corn and soybean phases of crop  
139 rotations at both sites. At each site the following glyphosate treatments were established: a GR  
140 cultivar with no glyphosate applied and the same GR cultivar with glyphosate applied at 0.87 kg  
141 ha<sup>-1</sup> twice at 5 and 7 weeks after planting. Each plot was four rows (4.6 m) wide and 6.1 m  
142 long. Soybean cultivar USG Allen (GR) was planted at 350,000 seeds ha<sup>-1</sup> and the corn cultivar  
143 DKC 65-17 RR2 (GR) was planted at 30,000 seeds ha<sup>-1</sup>. In Beltsville the corn or soybean plots  
144 are each a phase of the main plot rotation which is farming system (NT-18yr, CT-18yr, Org3-  
145 none or Org6-none) in this experimental design each phase of the rotation is considered a split-  
146 plot of the main plot which is cropping system. At both sites four replicates of each factor and  
147 level were established. All plots were hoed by hand periodically throughout the season to keep  
148 them weed-free.

149 In October of each year, corn was harvested with an Almaco small plot combine  
150 (Almaco, Nevada, IA); grain yield was estimated at 15.5% moisture from the two center rows of  
151 the 6.1 m plots. In 2013 the soybean was harvested with a Almaco small plot combine and in

152 2014 the soybean were hand harvested and threshed from 3.05 m of the two center rows. Dry  
153 weights were calculated at 13.5% moisture.

#### 154 **Soil Baseline Characteristics**

155 Beltsville soils are Coastal Plain silty loam Ultisols, consisting primarily of Christiana,  
156 Keyport, Matapeake and Mattapex soil map units. The soils at the Stoneville site were a silt  
157 loam typic Endoqualfs dominated by Dundee soil map units. At planting, soil samples from the  
158 top 15-cm depth were collected from each plot by combining soil from six or more cores (7.5 cm  
159 diameter and 15 cm depth) sampled in a semi-random pattern in a given plot. Samples were air-  
160 dried and sieved to 2 mm. The cores were collected on a diagonal line between the second and  
161 third crop rows, 3 m from each end of a given plot. Soil samples were analyzed by the  
162 Agricultural Analytical Services Laboratory at Pennsylvania State University for: pH, organic  
163 matter (OM), CEC, P, K, Mg, Ca, S, B, Zn, Mn, Fe, Cu, As, Al, Ba, Cd, Co, Cr, Ni, Pb, Se, and  
164 Sr. pH was determined in a 1:1 water dilution, OM was determined by mass loss on combustion  
165 and CEC was determined using the methods of Ross, D. and Q. Ketterings [25]. Mehlich 3  
166 extractions were used to quantify Ca, Mg, and K; all other metals are expressed as total sorbed  
167 using the EPA 3050 method [26].

#### 168 **Rhizosphere Soil and Root Sampling**

169 At the V3 to V4 crop growth stage (4 to 6 weeks after planting) and one day prior to  
170 glyphosate application six plants and root-associated soil were excavated from each plot by  
171 removing soil monoliths with 15 cm radius from stem and 15 cm deep using surface sterilized  
172 sharpshooter shovels. This time point is referred to as "PRE-spray." Soil monoliths were placed  
173 on a sieve and soil around the root ball was gently removed by shaking and passed through a 2  
174 mm sieve; this soil was considered bulk soil. Soil adhering to roots after this procedure  
175 (considered rhizosphere soil) was brushed onto a 2 mm sieve using a camel hair brush. Roots  
176 were brushed thoroughly, yet not so the integrity of the root surface was compromised. The  
177 rhizosphere samples from the six plants were pooled and 5 g were added to a 15 ml falcon tube

178 containing 10 ml of MoBio LifeGuard nucleic acid preservation solution. The contents of the  
179 tubes were mixed and frozen at -80 °C. Plants were placed at 4 °C until processed further.

180       Approximately twenty days after glyphosate was applied to the GR corn and soybean  
181 plots (at growth stage R2 to R3) the soil monolith sampling was repeated in the same plots.  
182 Samples were labeled “POST-spray.” Roots and adhering soils were collected and processed  
183 the same as for PRE-spray samples. At each site, sampling was determined by the  
184 developmental stage of the crop plants and was not constrained by Julian calendar dates.

### 185 **Identification of Endophytes from Roots**

186       Two-centimeter sections of root were cut at random sixteen times from each of six fresh  
187 root systems for each treatment. The total wet weight of the 16 sections was recorded. Sections  
188 were surface sterilized for 2 minutes in 1.25% sodium hypochlorite, followed by three rinses in  
189 sterile distilled water. Sections were blotted dry on sterile paper towel and eight root sections  
190 were placed on a plate containing Komada’s Medium [27]. Plated roots were incubated in  
191 ambient light at room temperature until colonies emerged. Fungal mycelium and spores from  
192 emerging colonies were sampled and examined on a Nikon E60 microscope and identified to  
193 genus, or to broader morphological group, based on taxonomic features. Colonies of typical  
194 morphology were plated onto minimal media to induce sporulation for further identification.  
195 Colonies not producing spores were characterized as “non-sporulating.” Polymerase chain  
196 reaction (PCR) screens for ITS followed by cloning and sequencing were conducted on over  
197 384 colonies of typical morphology to validate microscopic identification. The methods followed  
198 those described in (Chung et al. 2008). Sequences were quality checked and aligned using the  
199 DNASTar suite of software (DNASTar, Madison, WI, USA), and identified using the basic local  
200 alignment search tool and GenBank nucleotide data bank from the National Center for  
201 Biotechnology Information, Bethesda, MD, USA (<http://www.ncbi.nlm.nih.gov/>. Accessed fall,  
202 2014).

### 203 **Illumina Sequencing Library Preparation from Rhizosphere Soils**



204 Rhizosphere and bulk soils preserved in LifeGuard at -80 °C were thawed and 800 µl of  
205 each slurry was processed using a PowerSoil-htp 96 Well Soil DNA Isolation Kit (MoBio  
206 Laboratories Inc, Solana Beach, CA) according to the manufacturer's recommendations. DNA  
207 was quantified and quality verified using a NanoDrop 2000 spectrophotometer (Thermo Fisher  
208 Scientific, Pittsburgh, PA). 16S metagenome sequencing was conducted according to the  
209 Illumina protocol Library Preparation Manual Part# 1504423 Rev. B, Illumina Inc.,  
210 [www.illumina.com](http://www.illumina.com). Five µl of cleaned adapter amplicon product for each sample were used for  
211 index PCR using the Nextera XT Index Kit (Part# FC-131-1002; 16S Metagenomic Sequencing  
212 Library Preparation Manual Part# 1504423 Rev. B, Illumina Inc., [www.illumina.com](http://www.illumina.com)). Index PCR  
213 products were cleaned according to the Illumina protocol (16S Metagenomic Sequencing  
214 Library Preparation Manual Part# 1504423 Rev. B, Illumina Inc., [www.illumina.com](http://www.illumina.com)), and 2 µl  
215 aliquots per sample from each 96-well PCR plate were pooled for the final Illumina library. For  
216 analysis, one-hundred µl of 10 nM solutions of each library pool were frozen and shipped on dry  
217 ice for analysis on an Illumina MiSeq system at the Center for Genome Research and  
218 Bioinformatics (CGRB), Oregon State University, Corvallis, OR. For the Beltsville site, where a  
219 total of four cropping systems were also sampled, a total of 512 samples were sequenced. For  
220 the Stoneville site 256 samples were sequenced.

## 221 **Bioinformatics and Statistical Analysis**

222 *Sequence filtering and trimming.* Reads were returned from CGRB after initial quality  
223 control with standard Illumina workflows, including quality filtering and adapter trimming. Raw  
224 data is available via the AgData commons NUMBER. Scripts used in subsequent steps can be  
225 found at "[https://github.com/rmkepler/FSP\\_script\\_repository](https://github.com/rmkepler/FSP_script_repository)". Prior to joining paired ends and  
226 taxonomy assignment, forward and reverse primers were removed and sequences quality  
227 trimmed (-q 22) at the 3-prime end using Cutadapt (version 1.8.3). Reads lacking primer  
228 sequences or shorter than 75 bp before trimming were discarded.

229           *Assembly and taxonomy assignment.* The R package Dada2 [28] was used for paired  
230 end assembly and taxonomy assignment. The command “filterandtrim” was used to remove  
231 sequences with an expected error rate greater than two, and any sequences containing “N”  
232 values (unreadable bases). Error rates were estimated for forward and reverse reads. Filtered  
233 reads were then dereplicated with the “derepFastq” command. Dereplicated sequences were  
234 denoised with the “dada” command and then paired ends were merged. Chimeric sequences  
235 were removed with the command “removeBimeraDenovo”. Taxonomy was assigned to the  
236 chimera-free table of sequences with the dada2 implementation of the RDP classifier [29]. The  
237 UNITE database (version 7.2) [30] was used as the reference for identification of fungal ITS  
238 sequence variants, and silva (release 132) [31] was used for prokaryotes.

239           *Community analysis.* We transformed community count data into relative abundance,  
240 then calculated Bray-Curtis dissimilarity. Principal components analysis (PCA) was applied to  
241 the Bray-Curtis dissimilarity matrix using the ordinate function of the vegan package v. 2.4 [32]  
242 as implemented in phyloseq v. 1.22.2 [33] for both fungal and prokaryotic barcodes.

243           After subsetting by crop and site, richness and evenness were estimated from rarefied  
244 datasets of the raw sequence counts using vegan. DESeq2 v. 1.18.1 [34] was used to produce  
245 variance stabilized datasets [35]. Bray-Curtis dissimilarity for each sample was used for PCA.  
246 We used PERMANOVA to determine significance of main effects and interactions between the  
247 following factors: farming system, soil zone, glyphosate treatment, sampling date, and year. The  
248 farming system factor had 4 categories for Beltsville (CT, NT, Org3 and Org6) and 2 for  
249 Stoneville (NT\_none, NT\_15yr). All other factors had two categories at both sites: soil zone  
250 (bulk and rhizosphere); year (2013, 2014); glyphosate treatment (spray, no spray); sampling  
251 date (PRE glyphosate application, and POST glyphosate application). A repeated measures  
252 model based on the plot ID was used.

253           The effect of glyphosate treatment on microbial communities was tested with the  
254 Wilcoxon signed-rank test of differences between dates as implemented in the longitudinal plug-

255 in for Qiime2 [36]. The test was applied separately for three measures of richness: observed,  
256 Shannon's and Simpson's.

257 *Differentially abundant taxa.* Tests for differentially abundant taxa in response to  
258 glyphosate treatment were conducted in DESeq2 using likelihood ratio tests after subsetting  
259 fungal and prokaryotic data by site, crop, and farming system. The test compared a full model  
260 including group, sampling date terms, as well as an interaction term, where group is defined as  
261 the combination of farming system and glyphosate treatment (e.g. Org3\_spray) and sampling  
262 date corresponds to PRE-spray and POST-spray sampling events. The full model was  
263 compared to a reduced model lacking the interaction term. Thus, significant interaction terms  
264 would indicate sampling date and glyphosate application interacted to be important predictors of  
265 microbial abundance. This was tested for every fungal and bacterial taxon identified. Datasets  
266 with untransformed counts were used as the starting data, which were then variance-stabilized  
267 during testing.

## 268 **Results**

269 From sequencing analysis a total of 68,964 unique fungal and 72,454 unique prokaryotic  
270 sequence variants were identified across all samples. Beltsville and Stoneville shared 13,964  
271 bacterial and 5,740 fungal taxa. Stoneville featured 62,985 and 29,780 bacterial and fungal  
272 taxa, respectively. Beltsville featured 41,538 and 44,924 unique bacterial and fungal taxa,  
273 respectively. Fungal richness was higher for all Beltsville farming systems, compared with  
274 Stoneville, with the exception of the Shannon's and Simpson's diversity metrics for Org\_3  
275 (Figure 1A). Conversely, prokaryotic diversity was greater for Stoneville in all measures (Figure  
276 1B).

277 Principal component analysis showed that Beltsville and Stoneville communities were  
278 distinct (Figure 1C & D). Permanova analysis of relative abundance for fungi and prokaryotes  
279 revealed that site was the most significant factor accounting for Bray-Curtis dissimilarity  
280 distances in fungi and prokaryotes ( $p = 0.001$  in both cases. Fungal  $R^2 = 0.19$ , Prokaryote  $R^2 =$

281 0.16 ; supplemental data). Differences between the Stoneville and Beltsville microbial  
282 communities were driven by differences in edaphic factors. Soil chemical characteristics differed  
283 between the two sites (Canonical Discrimination Analysis,  $p < 0.001$ ,  $R^2 = 0.99$ ), and between  
284 cropping systems (Canonical Discrimination Analysis  $p < 0.001$ ,  $R^2 = 0.99$ ). Soil in Stoneville was  
285 significantly higher in pH and the cations Arsenic (As), Barium (Ba) and Strontium (Anova,  
286  $p < 0.001$ ), whereas Beltsville soil contained significantly more Phosphorous (P), Lead (Pb),  
287 Sulfur (S), Chromium (Cr), Iron (Fe) and OM (Anova,  $p < 0.001$ ) (Figure 1E). In order to increase  
288 power to detect local effects of glyphosate treatment, we analyzed sites and crop treatments  
289 separately.

290 Farming system was the largest driver of fungal community structure regardless of crop  
291 (Figure 2 & 3) in both Beltsville (Permanova; corn:  $p = 0.001$ ,  $R^2 = 0.16$ ; soybean;  $p = 0.001$ ,  $R^2$   
292  $= 0.16$ ) and Stoneville (Permanova; corn:  $p = 0.001$ ,  $R^2 = 0.24$ ; soybean;  $p = 0.001$ ,  $R^2 = 0.23$ ).  
293 Year of sampling was also significant but explained less variance in both Beltsville (corn:  $p =$   
294  $0.001$ ,  $R^2 = 0.046$ ; soybean;  $p = 0.001$ ,  $R^2 = 0.043$ ) and Stoneville (corn:  $p = 0.001$ ,  $R^2 = 0.051$ ;  
295 soybean;  $p = 0.001$ ,  $R^2 = 0.052$ ). No significant interaction was noted between sampling date  
296 and glyphosate treatment ( $p = 0.488$  and  $0.296$  for corn and soybean, respectively).  
297 Rhizosphere and bulk soil samples were also not significantly different (Supplemental data) for  
298 any crop or site. Likelihood ratio tests of taxon abundance in DESeq2 also confirmed no  
299 glyphosate treatment; the sampling date-glyphosate treatment interaction did not significantly  
300 increase the explanatory power of the model for any taxon (supplementary data), regardless of  
301 crop or farming system.

302 Farming system was also a driver of prokaryote community structure in Beltsville  
303 (Permanova; corn:  $p = 0.001$ ,  $R^2 = 0.096$ ; soybean;  $p = 0.001$ ,  $R^2 = 0.09$ ) and Stoneville  
304 (Permanova; corn:  $p = 0.001$ ,  $R^2 = 0.21$ ; soybean;  $p = 0.001$ ,  $R^2 = 0.16$ ). Farming explained less  
305 variation in Beltsville prokaryotic communities (Figure 2), than in Stoneville (Figure 3). The year  
306 term explained a lesser amount of variance for Beltsville (corn:  $p = 0.001$ ,  $R^2 = 0.096$ ; soybean;

307  $p = 0.001$ ,  $R^2 = 0.086$ ) and Stoneville (corn:  $p = 0.001$ ,  $R^2 = 0.051$ ; soybean;  $p = 0.001$ ,  $R^2 =$   
308 0.069). The interaction between glyphosate with sampling date was not significant for either  
309 crop (Supplemental data). Likelihood ratio tests of taxon abundance in DESeq2 also confirmed  
310 no glyphosate treatment; the sampling date-glyphosate treatment interaction did not significantly  
311 increase the explanatory power of the model for any taxon (supplementary data), regardless of  
312 crop or farming system (supplementary data).

313 Wilcoxon rank sum tests showed several instances where species richness differed  
314 significantly between the PRE and POST sampling dates (Figure 4, Supplemental Data);  
315 however, differences were observed in both glyphosate and no-glyphosate treatments,  
316 indicating this is a seasonality effect, and not due to glyphosate exposure. In Beltsville, corn and  
317 soybean differed in their response over the two dates. Prokaryote richness for corn in every  
318 Beltsville farming system was significantly different between the two dates. This trend was also  
319 observed, but to a lesser degree in fungal communities, with half of the treatments differing  
320 significantly for both spray and no spray treatments. Fungal communities did not differ  
321 seasonally in the Beltsville soybean plots, and fungal species richness was unaffected by  
322 sampling date for both corn and soybean in the Stoneville samples.

323 The root endophyte screening required analysis of over 6100 root segments and  
324 identified over 2400 fungal colonies. Significantly more colony forming units (CFU)s were  
325 observed in 2013 than in 2014 at the Beltsville site ( $p < 0.0003$ ), but no differences in the number  
326 of CFUs were observed between years at the Stoneville site. A total of 384 of the typical  
327 morphotypes were ITS amplicon sequenced, resulting in 11 identified dominant taxa: *Fusarium*  
328 *sp.*, *Macrophomina sp.*, *Alternaria sp.*, *Cladosporium sp.*, *Penicillium sp.*, *Zygomycota sp.*,  
329 *Trichoderma sp.*, and *Epicoccum sp.* There was no significant difference in abundance of  
330 *Fusarium sp.* or the other taxa in the glyphosate sprayed and unsprayed plots, regardless of  
331 site, crop, or year ( $p > 0.07$ ) (Figure 4b).

332           There was no significant difference in corn yield among systems or among glyphosate  
333 application treatments for either 2013 or 2014 (Table 1). Corn yields were not significantly  
334 different from the county averages for all systems with a mean among systems of 9339.4 kg/ha.  
335 In 2013 an error occurred while using the small plot combine and beans harvested from different  
336 replicates were mixed, rendering the data unusable. In 2014 soybean yields were similar to the  
337 county averages with a mean of 2326.5 kg/ha. There was no significant difference in yield  
338 across farming systems, and no effect of glyphosate treatment on yield (Table 1)

339

## 340 **Discussion**

341           The structure of prokaryote and fungal communities among farming systems and  
342 between sampling dates were not driven by glyphosate use. Instead, tillage and carbon inputs  
343 appear to be the primary drivers of soil microbiome structure. For instance, even though the  
344 Beltsville site had a common history of no-till management prior to 1996, microbial communities  
345 today are easily differentiated by farming system. Differences in management have effects that  
346 extend beyond microbial taxa to include nematodes [37], as well as soil organic matter and  
347 phosphorous concentrations, greenhouse gas emissions, and total energetic costs of the  
348 farming system [24, 38, 39].

349           The absence of glyphosate effects in naïve soil communities suggests that typical  
350 application rates of glyphosate do not alter the overall microbial community. Existing literature  
351 suggests most microbial communities are susceptible to disturbance, although bias against  
352 reporting of no treatment could affect this view [40]. Understanding the factors contributing to  
353 resistance of microbes in agroecosystems remains an important goal [41]. In the current study  
354 resilience to glyphosate spray could be linked to several factors. Some bacterial and fungal  
355 species are known to metabolize glyphosate, and the presence of these organisms may protect  
356 susceptible species [42, 43]. Studies reporting effects of glyphosate on soil microbes often use  
357 higher concentrations of the herbicide than the approved rate, which may overwhelm buffering

358 by resistant members. Concentration-dependent effects of glyphosate on soil microbial  
359 respiration and biomass have been reported and are consistent with reports on other  
360 agrochemicals, showing only transient effects at recommended application rates [44].

361 Greenhouse studies with GR wheat conducted in the Pacific Northwest found only minor  
362 effects of glyphosate on microbial communities, and determined site was a major driver of soil  
363 microbial community structure [20, 21]. While these studies did detect effects of glyphosate on  
364 the prevalence of a few microbial taxa, they applied glyphosate at twice the recommended rate,  
365 increasing the likelihood that the microbial community experienced a significant effect. These  
366 methodological differences may account for the detection of an effect on the abundance of  
367 some taxa after glyphosate exposure where none was detected here, and ultimately increase  
368 confidence in our finding that glyphosate has minimal effect on the microbial community when  
369 applied at the recommended rate.

370 The Beltsville and Stoneville sites differ in soil chemistry and physical characteristics  
371 (OM, pH). Soil microbial communities in these soils also differ considerably between sites  
372 (Figure 1), with Beltsville having higher overall fungal richness and Stoneville having higher  
373 prokaryotic richness (Figure 1). The higher richness of fungi and prokaryotes in Beltsville NT  
374 plots relative to the other Beltsville management types receiving tillage is consistent with  
375 previous studies, and may be due to the spatial heterogeneity that develops over time in the  
376 absence of tillage [45]. However, in spite of differences in microbial communities between sites  
377 and among management histories, fungal and prokaryotic richness were unaffected by  
378 applications of glyphosate in all management and crop treatments.

379 Community richness changed across the growing season regardless of glyphosate  
380 concentration (Figure 4). These results are similar to those of Hart et al. [46] in which the GR  
381 corn and its genetically close isolate were grown for one season in Canada and the microbial  
382 community compared by TRFLP with and without glyphosate application, although this study  
383 could not have tested the long term legacy of glyphosate application. This study also found that



384 seasonality was a significant controlling factor in microbial community structure with and without  
385 glyphosate under field conditions.

386 Previous culture-based work has found that *Fusarium* abundance increased and  
387 *Pseudomonas* abundance decreased with glyphosate use [11]. In those studies, *Fusarium* were  
388 presumed to be pathogenic while *Pseudomonas* were presumed to be symbionts. However, our  
389 metabarcoding and culture data failed to detect an effect of glyphosate on the abundance of any  
390 *Fusarium* or *Pseudomonas* spp. And while both barcoding and culture surveys detected other  
391 pathogens, none responded to glyphosate (Supplementary Data). Our results are consistent  
392 with previous metabarcoding studies [20, 21].

393 It is important to note that the ITS and 16s gene loci fail to resolve diversity at an  
394 adequate level to differentiate pathogenic genotypes from closely related non-pathogenic  
395 genotypes [47, 48]. For example, several species of *Metarhizium* known to occur at this site [49]  
396 were not represented in the samples from this study. Most likely pathogenic strains were not  
397 detected in this study. However, even if they are not identified to the strain level, pathogenic  
398 species contribute to the relative abundance of their constituent OTU, and we did not detect any  
399 change in total numbers of *Fusarium* spp. OTUs associating with crops due to glyphosate  
400 application. This holds true for other genera of pathogenic fungi such as *Alternaria* spp. and  
401 *Macrophomina* spp. (supplementary data). It should also be noted that while *Pseudomonas* spp.  
402 are often taken to be inherently beneficial, there are at least a few confirmed pathogens [48];  
403 and the type of beneficial function may differ substantially across strains. Regardless, as with  
404 fungi, no *Pseudomonas* spp. changed in prevalence as a result of glyphosate treatment.

405 We also found no reductions in yield by glyphosate application on GR corn or GR  
406 soybean in fields with a long history of glyphosate use or with no history of glyphosate use [50,  
407 51]. In a similar study with GR sweet corn, there was even a slight increase in yield associated  
408 with glyphosate application [52], which could have been due to hormesis, a phenomenon with



409 non-phytotoxic doses of glyphosate [53]. Lack of effects on yields are consistent with no  
410 substantial detrimental effects on rhizosphere microbes.

411         Although glyphosate is widely used across the globe, relatively few studies have  
412 investigated the effect of this herbicide on soil microbial communities in cropping systems with  
413 and without a legacy of glyphosate application. This work provides an important contribution into  
414 determining the effect of glyphosate on bacterial and fungal communities found in soils. No  
415 changes due to glyphosate, coupled with a trend towards higher species richness in no-till plots,  
416 suggests this widely employed management practice is not at risk of altering soil microbial  
417 communities in a negative manner. However, increased glyphosate application rates in  
418 response to evolution of resistant weeds could alter this conclusion. Whether the species  
419 richness of no-till systems translates to increases in ecosystem function supportive of crop  
420 productivity remains to be fully elucidated.

#### 421 **Acknowledgments**

422 Sarah Emche assisted with DNA extraction and sequencing preparation, root plating and isolate  
423 identification. Other people helped and they are...

#### 424 **Conflict of interest**

425 The authors declare they have no conflict of interest.

426

427

428 **References**

- 429 1. Cohen JE. Human Population: The Next Half Century. *Science* 2003; **302**: 1172–1175.
- 430 2. Tilman D, Balzer C, Hill J, Befort BL. Global food demand and the sustainable  
431 intensification of agriculture. *PNAS* 2011; **108**: 20260–20264.
- 432 3. Bruinsma J, Food and Agriculture Organization of the United Nations (eds). World  
433 agriculture: towards 2015/2030: an FAO perspective. 2003. Earthscan Publications,  
434 London.
- 435 4. Foley JA, DeFries R, Asner GP, Barford C, Bonan G, Carpenter SR, et al. Global  
436 Consequences of Land Use. *Science* 2005; **309**: 570–574.
- 437 5. Benbrook CM. Trends in glyphosate herbicide use in the United States and globally.  
438 *Environmental Sciences Europe* 2016; **28**: 3.
- 439 6. Steinrücken HC, Amrhein N. The herbicide glyphosate is a potent inhibitor of 5-  
440 enolpyruvylshikimic acid-3-phosphate synthase. *Biochemical and Biophysical Research  
441 Communications* 1980; **94**: 1207–1212.
- 442 7. Johal GS, Rahe JE. Effect of soilborne plant-pathogenic fungi on the herbicidal action of  
443 glyphosate on bean seedlings. *Phytopathology (USA)* 1984.
- 444 8. Johal GS, Huber DM. Glyphosate effects on diseases of plants. *European Journal of  
445 Agronomy* 2009; **31**: 144–152.
- 446 9. Coupland D, Caseley JC. Presence of 14c Activity in Root Exudates and Guttation Fluid  
447 from *Agropyron repens* Treated with 14c-Labelled Glyphosate. *New Phytologist* 1979; **83**:  
448 17–22.
- 449 10. Torstensson L. Behaviour of glyphosate in soils and its degradation. In: Grossbard E,  
450 Atkinson D (eds). *The herbicide glyphosate / edited by E. Grossbard, D. Atkinson*. 1985.  
451 Butterworths, London.

- 452 11. Kremer RJ, Means NE. Glyphosate and glyphosate-resistant crop interactions with  
453 rhizosphere microorganisms. *European Journal of Agronomy* 2009; **31**: 153–161.
- 454 12. Van Bruggen AHC, He MM, Shin K, Mai V, Jeong KC, Finckh MR, et al. Environmental and  
455 health effects of the herbicide glyphosate. *Science of The Total Environment* 2018; **616–**  
456 **617**: 255–268.
- 457 13. Hammerschmidt R. How glyphosate affects plant disease development: it is more than  
458 enhanced susceptibility. *Pest Management Science* 2018; **74**: 1054–1063.
- 459 14. Martinez DA, Loening UE, Graham MC. Impacts of glyphosate-based herbicides on  
460 disease resistance and health of crops: a review. *Environ Sci Eur* 2018; **30**: 2.
- 461 15. Larson RL, Hill AL, Fenwick A, Kniss AR, Hanson LE, Miller SD. Influence of glyphosate on  
462 *Rhizoctonia* and *Fusarium* root rot in sugar beet. *Pest Management Science* 2006; **62**:  
463 1182–1192.
- 464 16. Zobiolo LHS, Kremer RJ, Oliveira RS, Constantin J. Glyphosate affects micro-organisms in  
465 rhizospheres of glyphosate-resistant soybeans. *Journal of Applied Microbiology* 2011; **110**:  
466 118–127.
- 467 17. Barnett KA, Sprague CL, Kirk WW, Hanson LE. Influence of Glyphosate on *Rhizoctonia*  
468 Crown and Root Rot (*Rhizoctonia solani*) in Glyphosate-Resistant Sugarbeet. *Weed*  
469 *Science* 2012; **60**: 113–120.
- 470 18. Kandel YR, Bradley CA, Wise KA, Chilvers MI, Tenuta AU, Davis VM, et al. Effect of  
471 Glyphosate Application on Sudden Death Syndrome of Glyphosate-Resistant Soybean  
472 Under Field Conditions. *Plant Disease* 2014; **99**: 347–354.
- 473 19. Duke SO. Interaction of Chemical Pesticides and Their Formulation Ingredients with  
474 Microbes Associated with Plants and Plant Pests. *J Agric Food Chem* 2018; **66**: 7553–  
475 7561.

- 476 20. Schlatter DC, Yin C, Burke I, Hulbert S, Paulitz T. Location, Root Proximity, and  
477 Glyphosate-Use History Modulate the Effects of Glyphosate on Fungal Community  
478 Networks of Wheat. *Microb Ecol* 2017; 1–18.
- 479 21. Schlatter DC, Yin C, Hulbert S, Burke I, Paulitz T. Impacts of Repeated Glyphosate Use on  
480 Wheat-Associated Bacteria Are Small and Depend on Glyphosate Use History. *Appl*  
481 *Environ Microbiol* 2017; **83**: e01354-17.
- 482 22. Nguyen DB, Rose MT, Rose TJ, Morris SG, van Zwieten L. Impact of glyphosate on soil  
483 microbial biomass and respiration: A meta-analysis. *Soil Biology and Biochemistry* 2016;  
484 **92**: 50–57.
- 485 23. Cavigelli MA, Lengnick LL, Buyer JS, Fravel D, Handoo Z, McCarty G, et al. Landscape  
486 level variation in soil resources and microbial properties in a no-till corn field. *Applied Soil*  
487 *Ecology* 2005; **29**.
- 488 24. Spargo JT, Cavigelli MA, Mirsky SB, Maul JE, Meisinger JJ. Mineralizable soil nitrogen and  
489 labile soil organic matter in diverse long-term cropping systems. *Nutr Cycl Agroecosyst*  
490 2011; **90**: 253–266.
- 491 25. Ross DS, Ketterings Q. Recommended methods for determining soil cation exchange  
492 capacity. *Recommended soil testing procedures for the northeastern United States* 1995;  
493 **2**: 62–70.
- 494 26. USEPA. Test Methods for Evaluating Solid Waste. Volume IA: 3rd Edition. EPA/SW-846.  
495 1986. National Technical Information Service, Springfield, Va.
- 496 27. Komada H. Development of a selective medium for quantitative isolation of *Fusarium*  
497 *oxysporum* from natural soil. *Review of Plant Protection Research* 1975; **8**: 114–124.
- 498 28. Callahan BJ, McMurdie PJ, Rosen MJ, Han AW, Johnson AJA, Holmes SP. DADA2: High-  
499 resolution sample inference from Illumina amplicon data. *Nat Meth* 2016; **13**: 581–583.

- 500 29. Wang Q, Garrity GM, Tiedje JM, Cole JR. Naïve Bayesian Classifier for Rapid Assignment  
501 of rRNA Sequences into the New Bacterial Taxonomy. *Appl Environ Microbiol* 2007; **73**:  
502 5261–5267.
- 503 30. Nilsson RH, Larsson K-H, Taylor AFS, Bengtsson-Palme J, Jeppesen TS, Schigel D, et al.  
504 The UNITE database for molecular identification of fungi: handling dark taxa and parallel  
505 taxonomic classifications. *Nucleic Acids Res* .
- 506 31. Quast C, Pruesse E, Yilmaz P, Gerken J, Schweer T, Yarza P, et al. The SILVA ribosomal  
507 RNA gene database project: improved data processing and web-based tools. *Nucl Acids*  
508 *Res* 2013; **41**: D590–D596.
- 509 32. Dixon P. VEGAN, a package of R functions for community ecology. *Journal of Vegetation*  
510 *Science* 2003; **14**: 927–930.
- 511 33. McMurdie PJ, Holmes S. phyloseq: An R Package for Reproducible Interactive Analysis  
512 and Graphics of Microbiome Census Data. *PLOS ONE* 2013; **8**: e61217.
- 513 34. Love MI, Huber W, Anders S. Moderated estimation of fold change and dispersion for  
514 RNA-seq data with DESeq2. *Genome Biology* 2014; **15**: 550.
- 515 35. McMurdie PJ, Holmes S. Waste Not, Want Not: Why Rarefying Microbiome Data Is  
516 Inadmissible. *PLOS Computational Biology* 2014; **10**: e1003531.
- 517 36. Bokulich NA, Dillon MR, Zhang Y, Rideout JR, Bolyen E, Li H, et al. q2-longitudinal:  
518 Longitudinal and Paired-Sample Analyses of Microbiome Data. *mSystems* 2018; **3**:  
519 e00219-18.
- 520 37. Treonis AM, Unangst SK, Kepler RM, Buyer JS, Cavigelli MA, Mirsky SB, et al.  
521 Characterization of soil nematode communities in three cropping systems through  
522 morphological and DNA metabarcoding approaches. *Scientific Reports* 2018; **8**: 2004.
- 523 38. Cavigelli MA. Long-Term Agronomic Performance of Organic and Conventional Field  
524 Crops in the Mid-Atlantic Region. *Agronomy Journal* 2008; **100**.

- 525 39. Hoffman E, Cavigelli MA, Camargo G, Ryan M, Ackroyd VJ, Richard TL, et al. Energy use  
526 and greenhouse gas emissions in organic and conventional grain crop production:  
527 Accounting for nutrient inflows. *Agricultural Systems* 2018; **162**: 89–96.
- 528 40. Shade A, Peter H, Allison SD, Baho D, Berga M, Buergmann H, et al. Fundamentals of  
529 Microbial Community Resistance and Resilience. *Front Microbiol* 2012; **3**.
- 530 41. Busby PE, Soman C, Wagner MR, Friesen ML, Kremer J, Bennett A, et al. Research  
531 priorities for harnessing plant microbiomes in sustainable agriculture. *PLOS Biology* 2017;  
532 **15**: e2001793.
- 533 42. Shinabarger DL, Braymer HD. Glyphosate catabolism by *Pseudomonas sp.* strain  
534 PG2982. *Journal of Bacteriology* 1986; **168**: 702–707.
- 535 43. Dick RE, Quinn JP. Glyphosate-degrading isolates from environmental samples:  
536 occurrence and pathways of degradation. *Appl Microbiol Biotechnol* 1995; **43**: 545–550.
- 537 44. Imfeld G, Vuilleumier S. Measuring the effects of pesticides on bacterial communities in  
538 soil: A critical review. *European Journal of Soil Biology* 2012; **49**: 22–30.
- 539 45. Carson JK, Gonzalez-Quiñones V, Murphy DV, Hinz C, Shaw JA, Gleeson DB. Low Pore  
540 Connectivity Increases Bacterial Diversity in Soil. *Appl Environ Microbiol* 2010; **76**: 3936–  
541 3942.
- 542 46. Hart MM, Powell JR, Gulden RH, Dunfield KE, Peter Pauls K, Swanton CJ, et al.  
543 Separating the effect of crop from herbicide on soil microbial communities in glyphosate-  
544 resistant corn. *Pedobiologia* 2009; **52**: 253–262.
- 545 47. Laurence MH, Summerell BA, Burgess LW, Liew ECY. Genealogical concordance  
546 phylogenetic species recognition in the *Fusarium oxysporum* species complex. *Fungal*  
547 *Biology* 2014; **118**: 374–384.
- 548 48. Curran B, Jonas D, Grundmann H, Pitt T, Dowson CG. Development of a Multilocus  
549 Sequence Typing Scheme for the Opportunistic Pathogen *Pseudomonas aeruginosa*.  
550 *Journal of Clinical Microbiology* 2004; **42**: 5644–5649.

- 551 49. Kepler RM, Ugine TA, Maul JE, Cavigelli MA, Rehner SA. Community composition and  
552 population genetics of insect pathogenic fungi in the genus *Metarhizium* from soils of a  
553 long-term agricultural research system. *Environ Microbiol* 2015; n/a-n/a.
- 554 50. Reddy KN, Cizdziel JV, Williams MM, Maul JE, Rimando AM, Duke SO. Glyphosate  
555 Resistance Technology Has Minimal or No Effect on Maize Mineral Content and Yield. *J*  
556 *Agric Food Chem* 2018; **66**: 10139–10146.
- 557 51. Duke SO, Rimando AM, Reddy KN, Cizdziel JV, Bellaloui N, Shaw DR, et al. Lack of  
558 transgene and glyphosate effects on yield, and mineral and amino acid content of  
559 glyphosate-resistant soybean. *Pest Management Science* 2018; **74**: 1166–1173.
- 560 52. Williams MM, Bradley CA, Duke SO, Maul JE, Reddy KN. Goss's wilt incidence in sweet  
561 corn is independent of transgenic traits and glyphosate. *HortScience* 2015; **50**.
- 562 53. Brito IP, Tropaldi L, Carbonari CA, Velini ED. Hormetic effects of glyphosate on plants.  
563 *Pest Management Science* 2018; **74**: 1064–1070.
- 564
- 565

566 Figure 1. Principal component analyses of site chemistry, bacterial and fungal communities for  
567 sites in Beltsville, MD and Stoneville, MS. A) Chemical analysis of all plots in the first year of this  
568 study. B) Bray-Curtis dissimilarity of prokaryotic communities from all samples after rarefaction  
569 to a depth of 20,000 reads per sample. C) Bray-Curtis dissimilarity of fungal communities for all  
570 samples after relative abundance transformation of total counts.

571

572 Figure 2. Principal component analyses of microbial communities in Beltsville, MD, partitioned  
573 by crop. Prokaryotic community data drawn from a dataset rarefied to 20,000 reads per sample.  
574 Fungal data has been variance stabilized with negative binomial transformation in DESeq2.

575

576 Figure 3. Principal component analyses of microbial communities in Stoneville, MS, partitioned  
577 by crop. Prokaryotic community data drawn from a dataset rarefied to 20,000 per sample.  
578 Fungal data has been variance stabilized with negative binomial transformation in DESeq2.

579

580 Figure 4. Change in Shannon's richness of rarefied data across sampling dates in no-spray and  
581 spray treatments. Stars on each plot are for raw (\*) and false discovery rate corrected (\*\*) p-  
582 values less than 0.05 from Wilcoxon signed-rank test of differences between dates. Years are  
583 pooled, although graphed separately. Red points and line represent mean richness

584

585 Figure 5. Abundance of *Fusarium* isolates +/- standard deviation. A) corn. B) soy roots. Colors  
586 follow those used in Figures 2 & 3.

587



| Corn yield at 15.5% H <sub>2</sub> O (kg/ha) |               |      |                   |      |               |      |                   |      |
|----------------------------------------------|---------------|------|-------------------|------|---------------|------|-------------------|------|
| System                                       | 2013          |      |                   |      | 2014          |      |                   |      |
|                                              | DKC 65-17 RR2 |      | DKC 65-17 RR2+Gly |      | DKC 65-17 RR2 |      | DKC 65-17 RR2+Gly |      |
|                                              | LS Means      |      | LS Means          |      | LS Means      |      | LS Means          |      |
| CT                                           | 9535.55       | n.s. | 8847.79           | n.s. | 9797.60       | n.s. | 8966.96           | n.s. |
| NT                                           | 9780.09       | n.s. | 9140.77           | n.s. | 10756.83      | n.s. | 11122.74          | n.s. |
| ORG3                                         | 9209.83       | n.s. | 7634.06           | n.s. | 10225.41      | n.s. | 9496.73           | n.s. |
| ORG6                                         | 8832.09       | n.s. | 8509.80           | n.s. | 7627.45       | n.s. | 8184.97           | n.s. |

| Soybean Yield at 13.5% H <sub>2</sub> O (kg/ha) |          |  |           |          |      |           |      |
|-------------------------------------------------|----------|--|-----------|----------|------|-----------|------|
| System                                          | 2013     |  |           | 2014     |      |           |      |
|                                                 | Allen    |  | Allen+Gly | Allen    |      | Allen+Gly |      |
|                                                 | LS Means |  | LS Means  | LS Means |      | LS Means  |      |
| CT                                              | --       |  | --        | 2437.60  | n.s. | 2159.60   | n.s. |
| NT                                              | --       |  | --        | 2264.00  | n.s. | 2016.00   | n.s. |
| ORG3                                            | --       |  | --        | 2314.50  | n.s. | 2906.50   | n.s. |
| ORG6                                            | --       |  | --        | 2290.00  | n.s. | 2733.00   | n.s. |

588

589 Table 1. Corn and Soybean yield (kg/ha) for glyphosate treated or untreated plots in chisel till  
 590 (CT), no-till (NT), Organic 3 yr. rotation (Org3) or Organic 6 yr. rotations (Org6). Comparison of  
 591 means was calculated within each system for the glyphosate resistant genotype either treated  
 592 with Glyphosate (Gly) or not. In 2013 an error in microplot harvesting resulted in mixing of  
 593 treated and untreated plots therefore making the yield data un-usable.

594

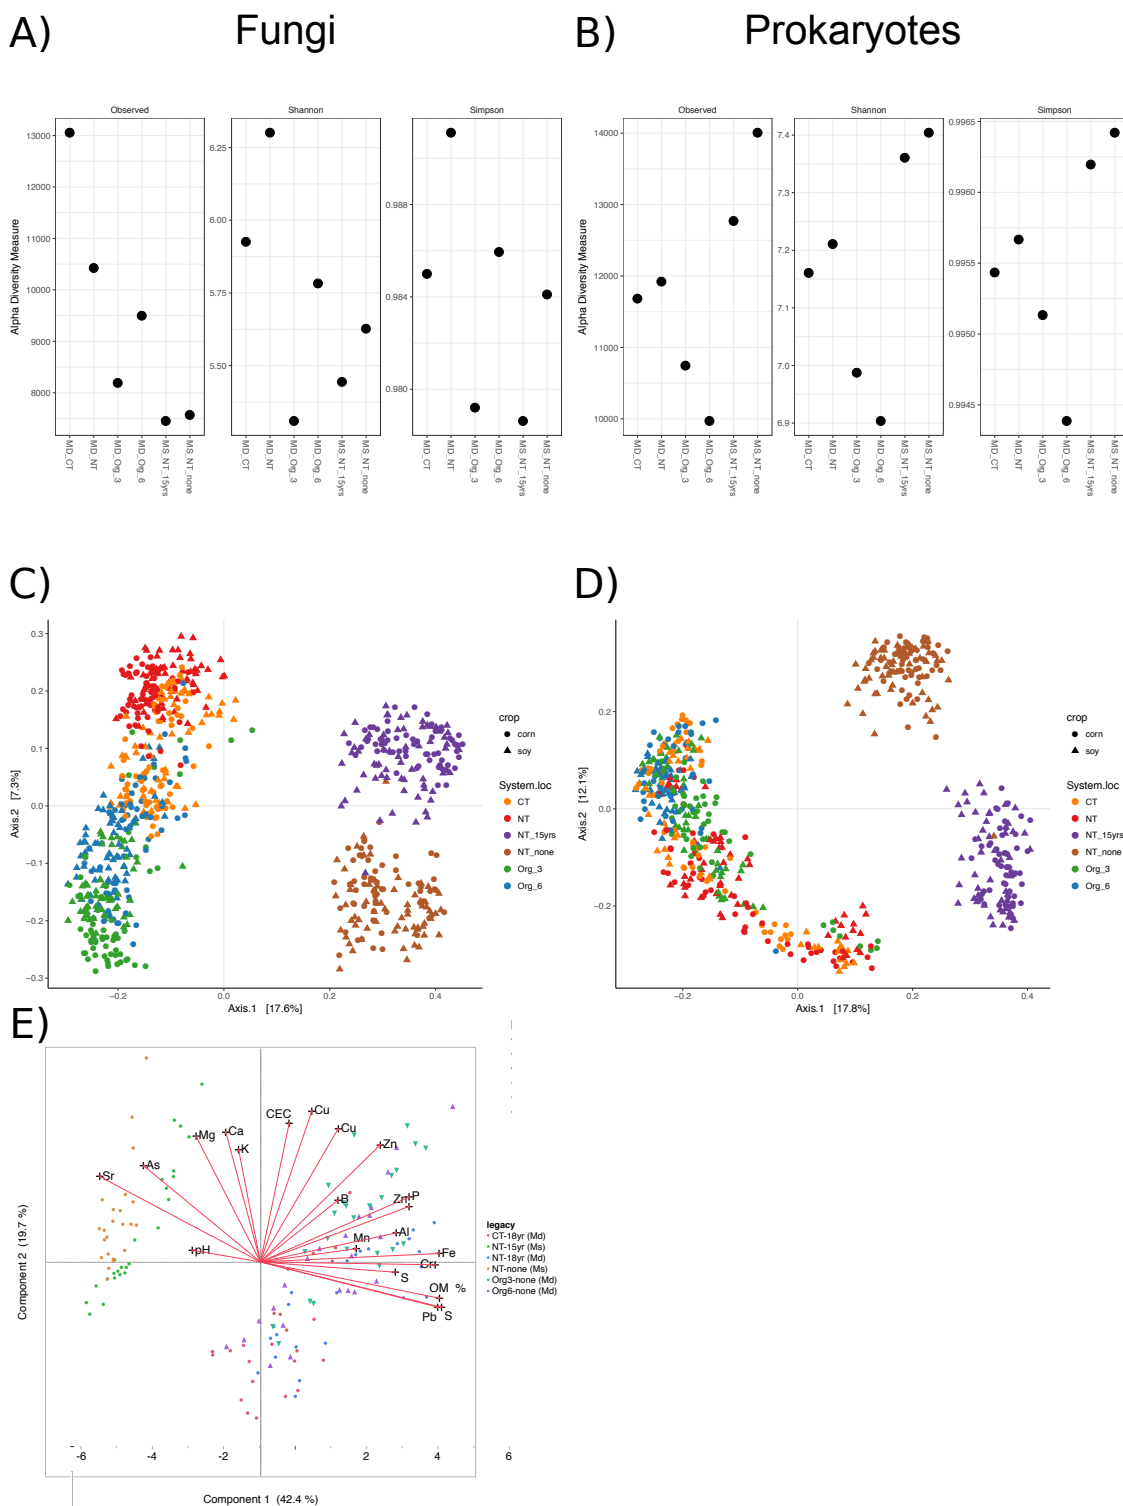

595

596 Figure 1

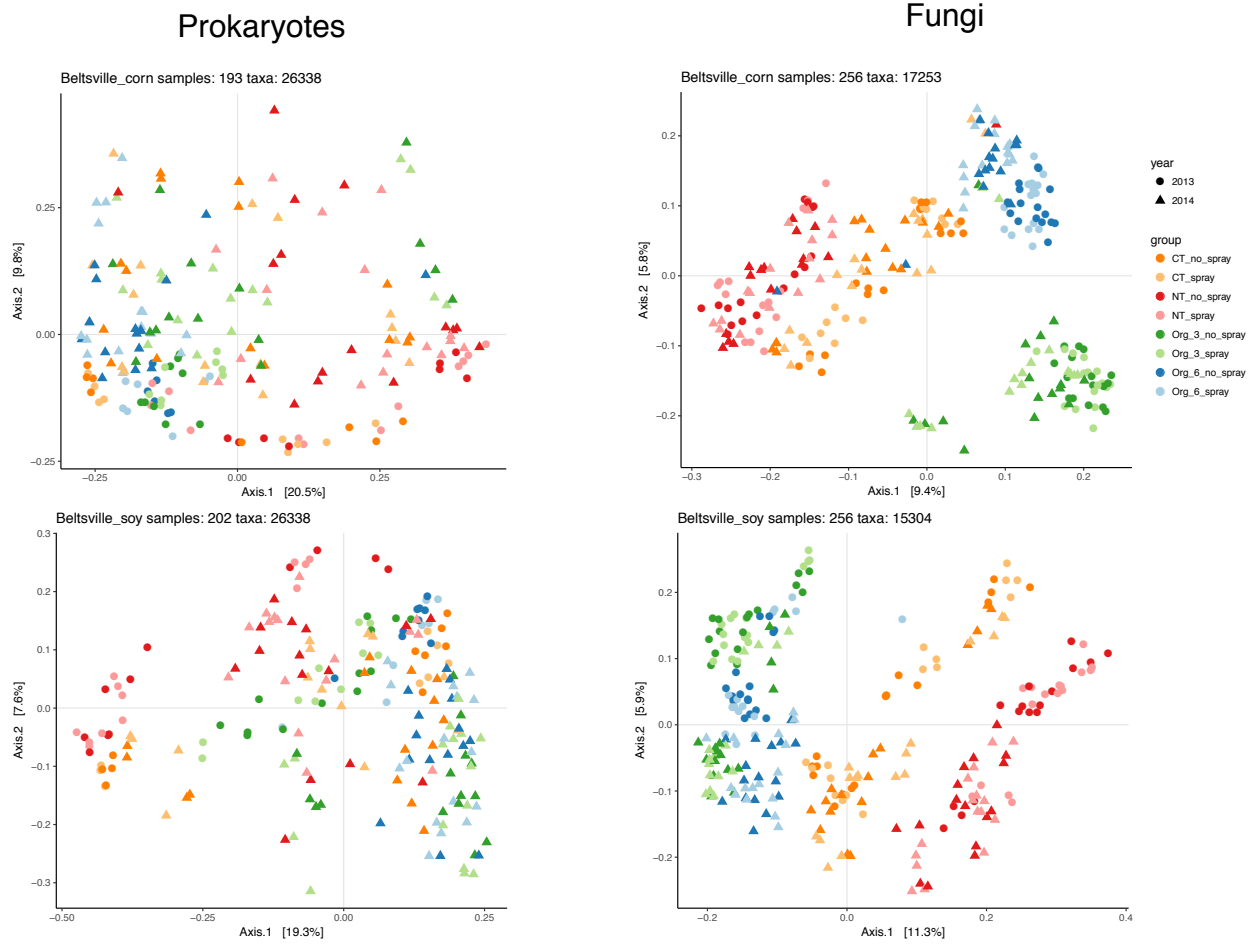

597

598 Figure 2

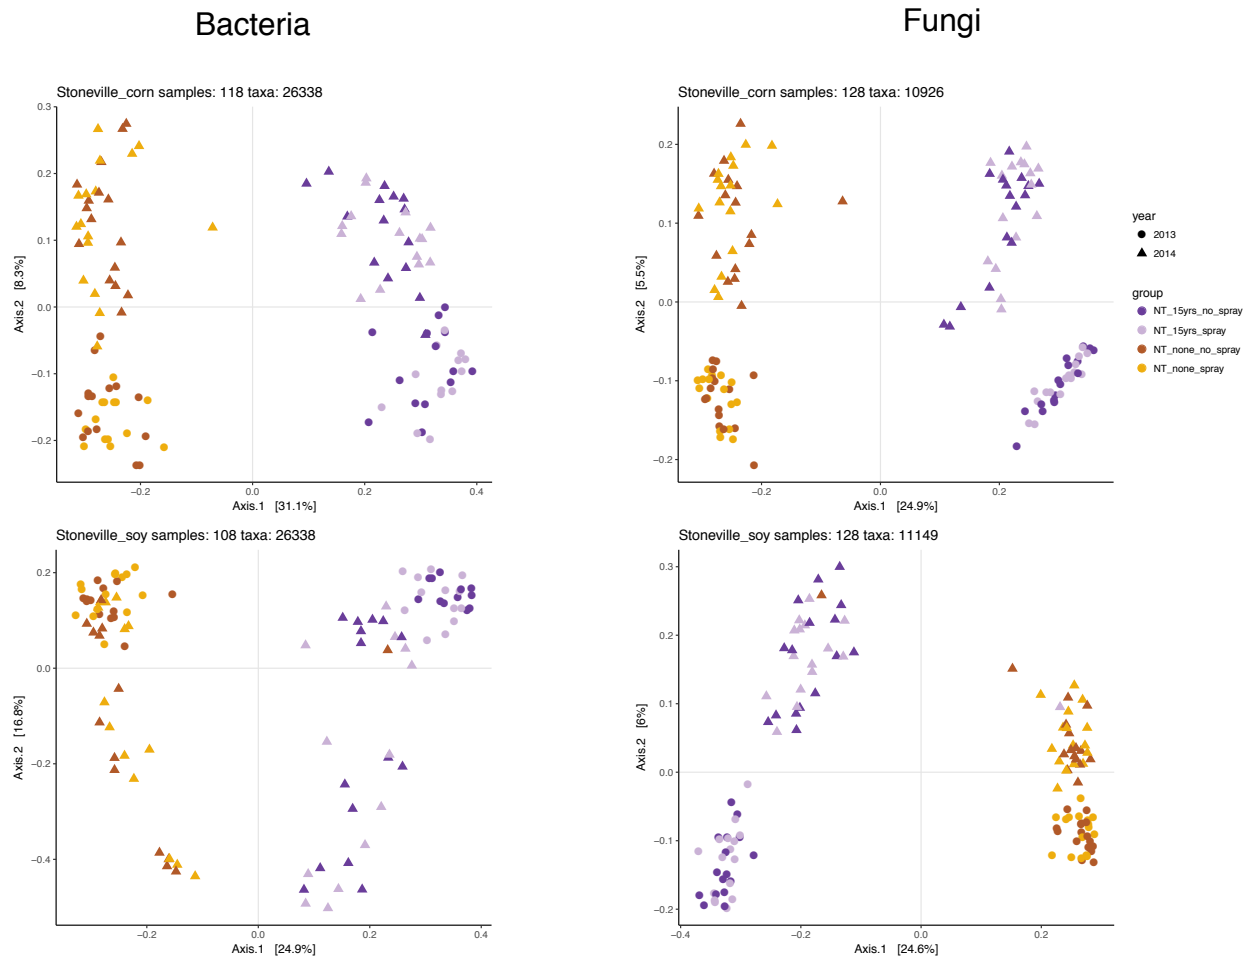

599

600 Figure 3



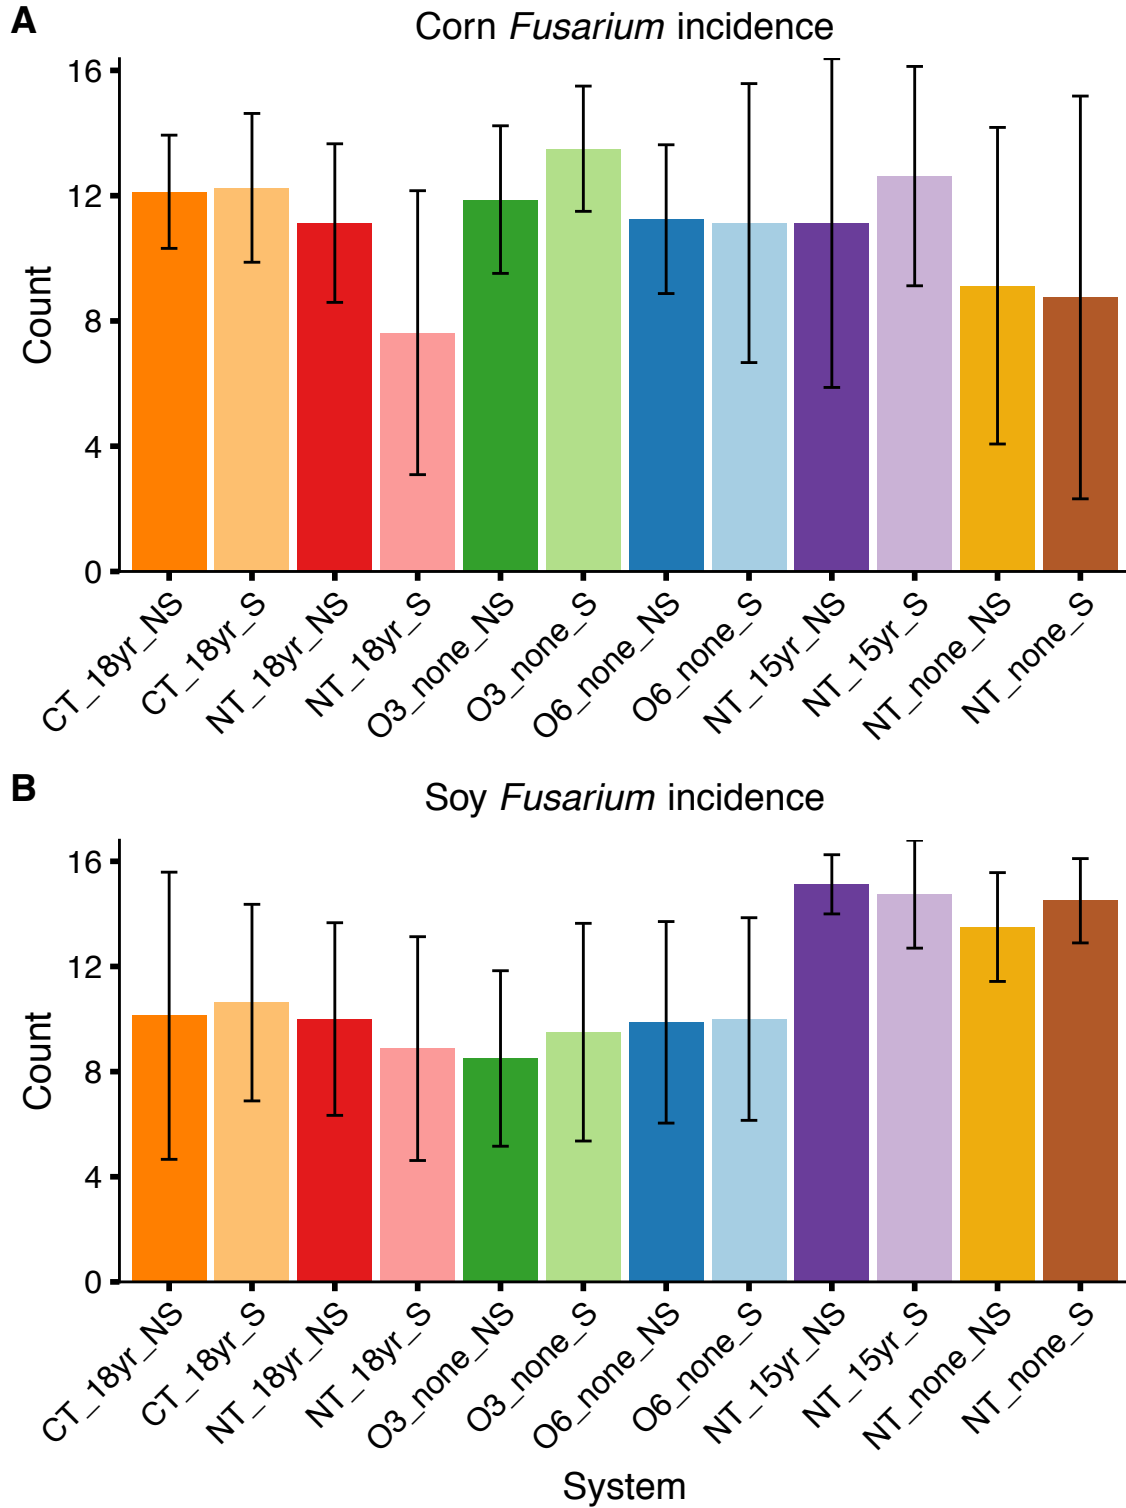

603

604 Figure 5
